# Supplementary material for: Zinc-induced ordering in L1 0 -type platinum-based nanoalloys for the electrocatalytic oxygen reduction reaction
Source: Royal Society of Chemistry journal article supplement (doi:10.1039/d5ta08256k), 2026-01-01
Supplement: d5ta08256k1.pdf [file d5ta08256k1.pdf]

Supplementary Information for

Zinc-Induced Ordering in  $L1_0$ -Type Platinum-Based Nanoalloys  
for the Electrocatalytic Oxygen Reduction Reaction

Wu Tian,<sup>a</sup> Ryota Sato,<sup>\*b</sup> Tomoki Uchiyama,<sup>c</sup> Yasutomi Tatetsu,<sup>d</sup> Kenshi Matsumoto,<sup>b</sup>  
Yoshiharu Uchimoto,<sup>c</sup> and Toshiharu Teranishi<sup>\*ab</sup>

<sup>a</sup> Department of Chemistry, Kyoto University, Uji, Kyoto 611-0011, Japan.

<sup>b</sup> Institute for Chemical Research, Kyoto University, Uji, Kyoto 611-0011, Japan.

<sup>c</sup> Graduate School of Human and Environmental Studies, Kyoto University, Sakyo-ku,  
Kyoto 606-8501, Japan.

<sup>d</sup> Department of Health Informatics, Meio University, Biimata, Nago, Okinawa 905-  
8585, Japan.

\*Corresponding Authors: Ryota Sato: [r-sato@scl.kyoto-u.ac.jp](mailto:r-sato@scl.kyoto-u.ac.jp); Toshiharu Teranishi:  
[teranisi@scl.kyoto-u.ac.jp](mailto:teranisi@scl.kyoto-u.ac.jp)

Table of Contents

|                                               |     |
|-----------------------------------------------|-----|
| 1. Supplementary Figures (Figs. S1–S26) ..... | S2  |
| 2. Supplementary Tables (Tables S1–S7) .....  | S24 |

Supplementary Figures:

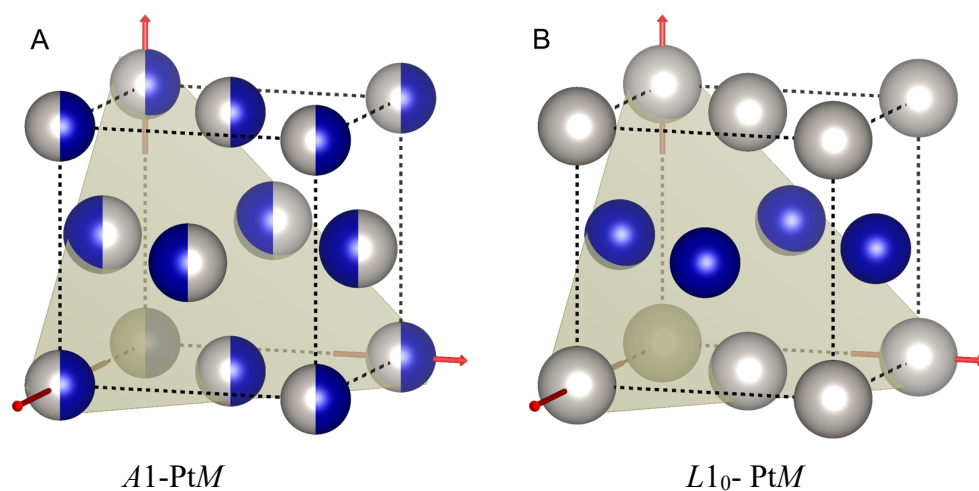

**Figure S1.** Unit cells of (A) *A1*-PtM and (B) *L1<sub>0</sub>*-PtM alloys. The {111} planes are indicated by gray triangles.

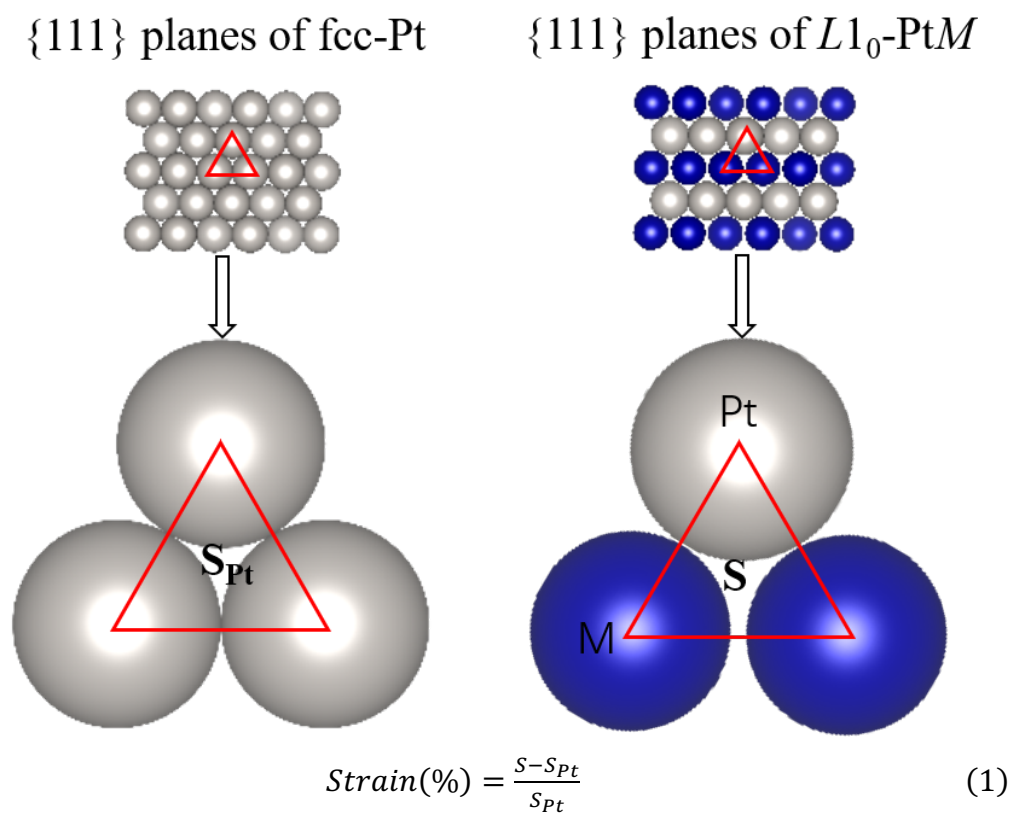

**Figure S2.** Schematic diagrams used for the calculation of surface strain.<sup>[2]</sup>

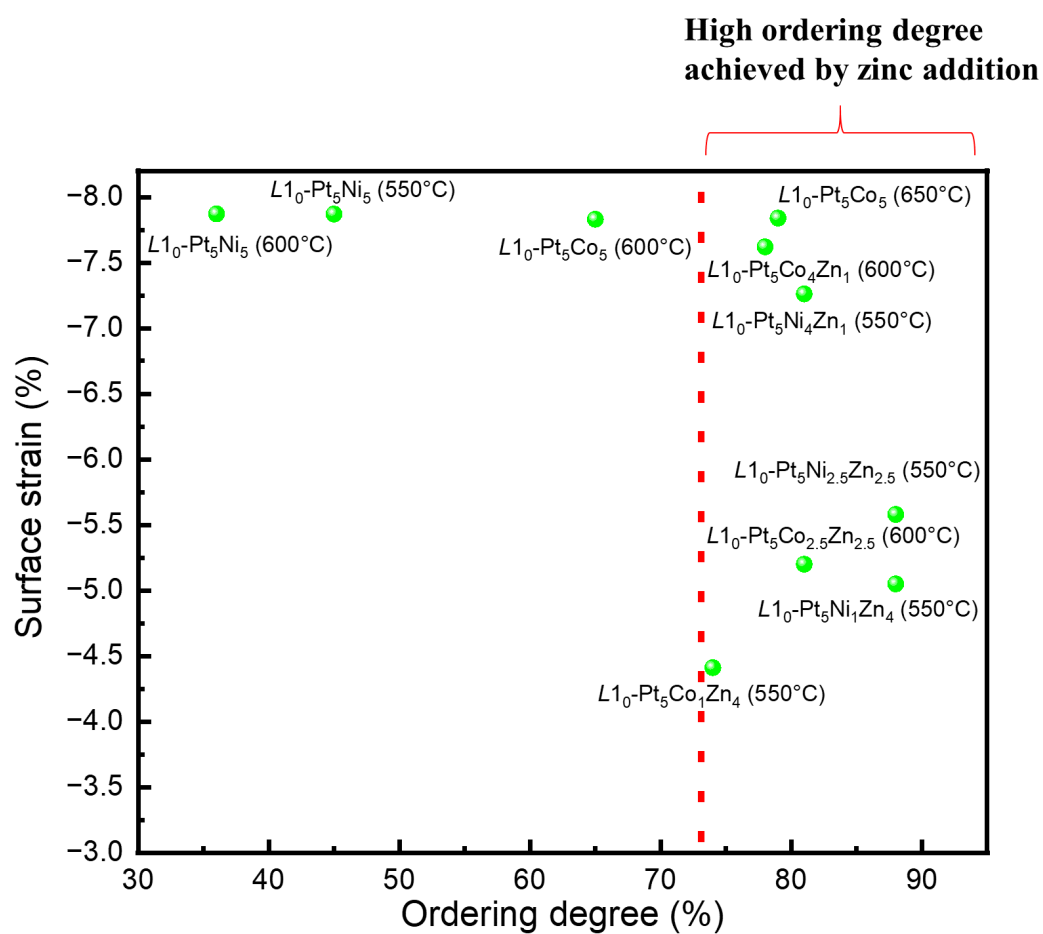

**Figure S3.** Dependence of the surface strain of Pt shells on the ordering degree of  $L1_0$  cores.

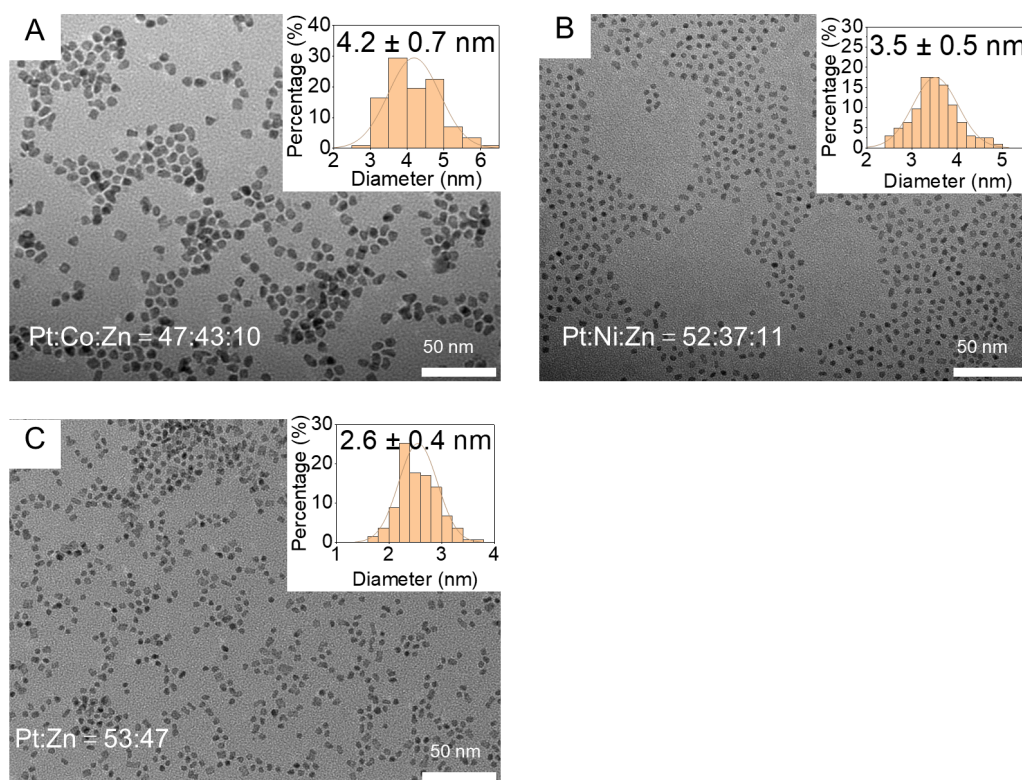

**Figure S4.** TEM images and size distributions (inset) of as-synthesized (A) Pt<sub>5</sub>Co<sub>1</sub>Zn<sub>4</sub>, (B) Pt<sub>5</sub>Ni<sub>1</sub>Zn<sub>4</sub> and (C) Pt<sub>5</sub>Zn<sub>5</sub> NPs.



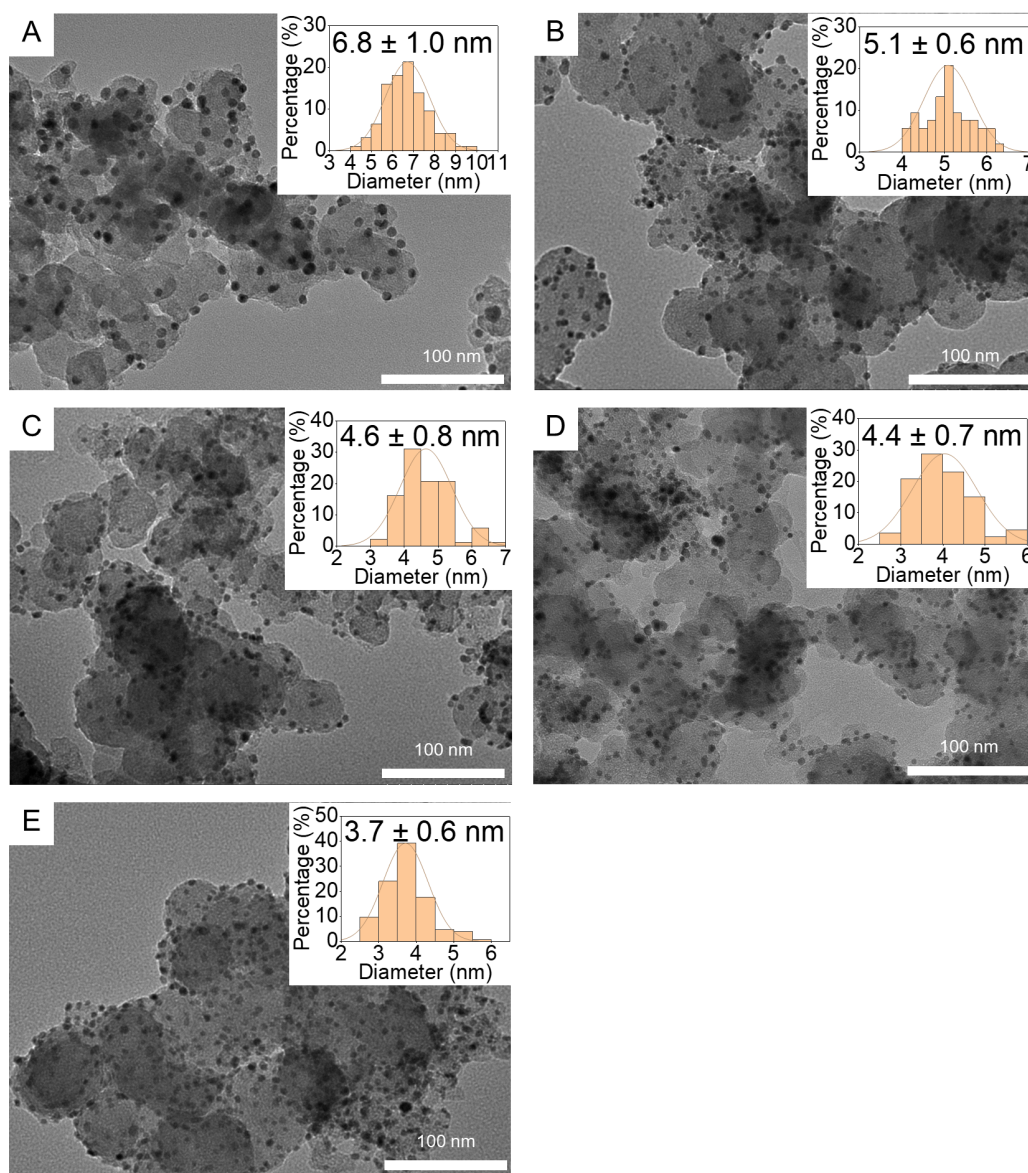

**Figure S5.** TEM images and size distributions (inset) of carbon-loaded (A)  $L1_0$ -PtCo-600 °C, (B)  $L1_0$ -Pt<sub>5</sub>Co<sub>4</sub>Zn<sub>1</sub>-600 °C, (C)  $L1_0$ -Pt<sub>5</sub>Co<sub>2.5</sub>Zn<sub>2.5</sub>-600 °C, (D)  $L1_0$ -Pt<sub>5</sub>Co<sub>1</sub>Zn<sub>4</sub>-550 °C and (E)  $L1_0$ -Pt<sub>5</sub>Zn<sub>5</sub>-550 °C NPs.

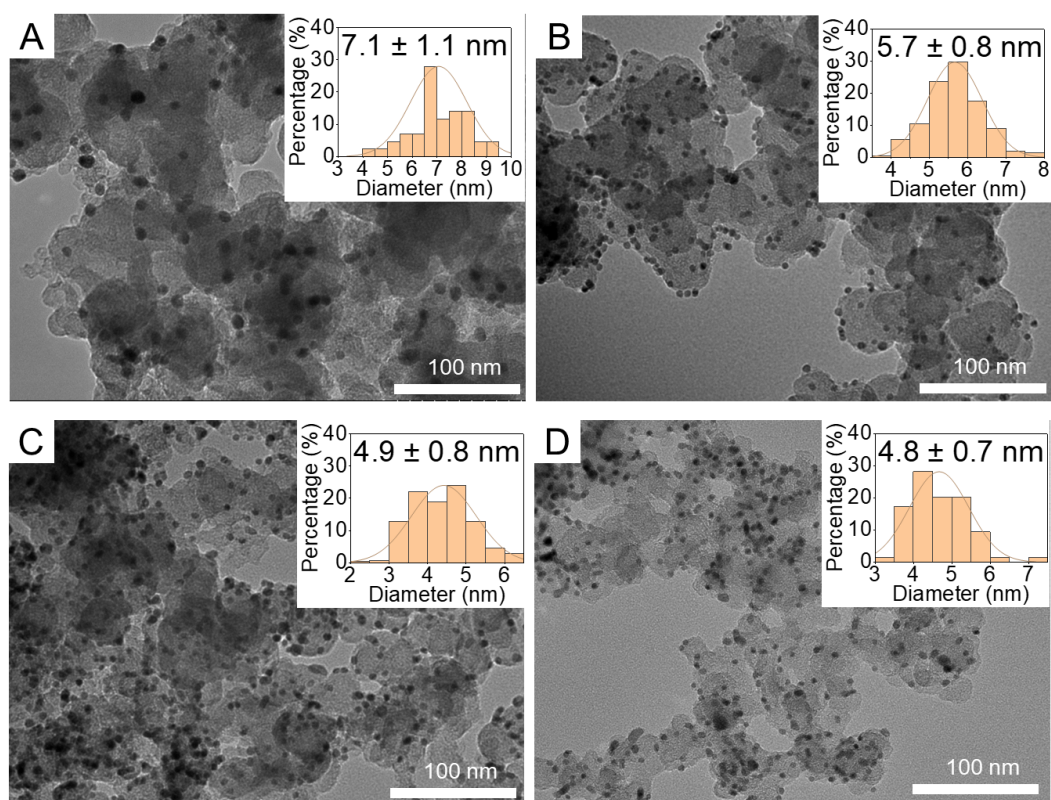

**Figure S6.** TEM images and size distributions (inset) of carbon-loaded (A)  $L1_0$ -PtNi-550 °C, (B)  $L1_0$ -Pt<sub>5</sub>Ni<sub>4</sub>Zn<sub>1</sub>-550 °C, (C)  $L1_0$ -Pt<sub>5</sub>Ni<sub>2.5</sub>Zn<sub>2.5</sub>-550 °C and (D)  $L1_0$ -Pt<sub>5</sub>Ni<sub>1</sub>Zn<sub>4</sub>-550 °C NPs.

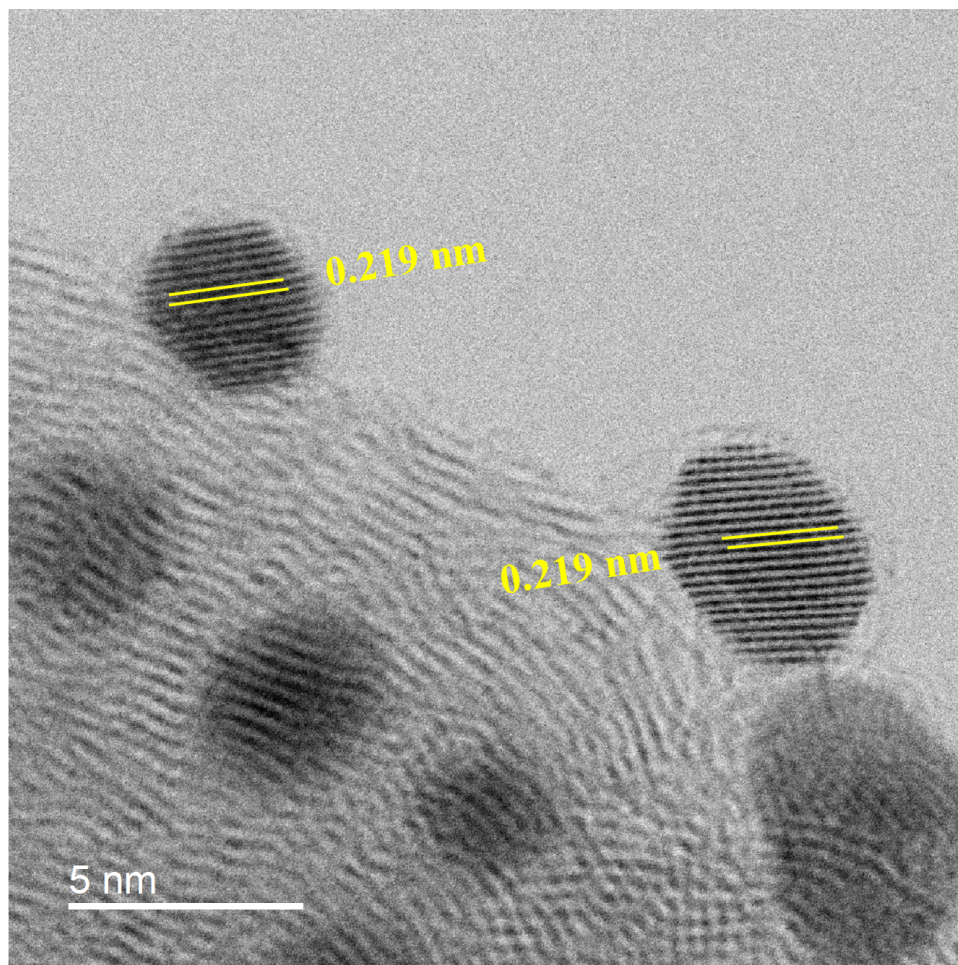

**Figure S7.** HR-TEM image of  $L_{10}$ -Pt<sub>5</sub>Co<sub>2.5</sub>Zn<sub>2.5</sub>@Pt NPs supported on carbon after reductive annealing and subsequent acid treatment. The lattice spacing is 0.219 nm, which is between those of  $L_{10}$ -PtCo ( $d_{(111)} = 0.217$  nm) and  $L_{10}$ -PtZn ( $d_{(111)} = 0.222$  nm), indicating the formation of  $L_{10}$ -Pt(Co,Zn) structure.

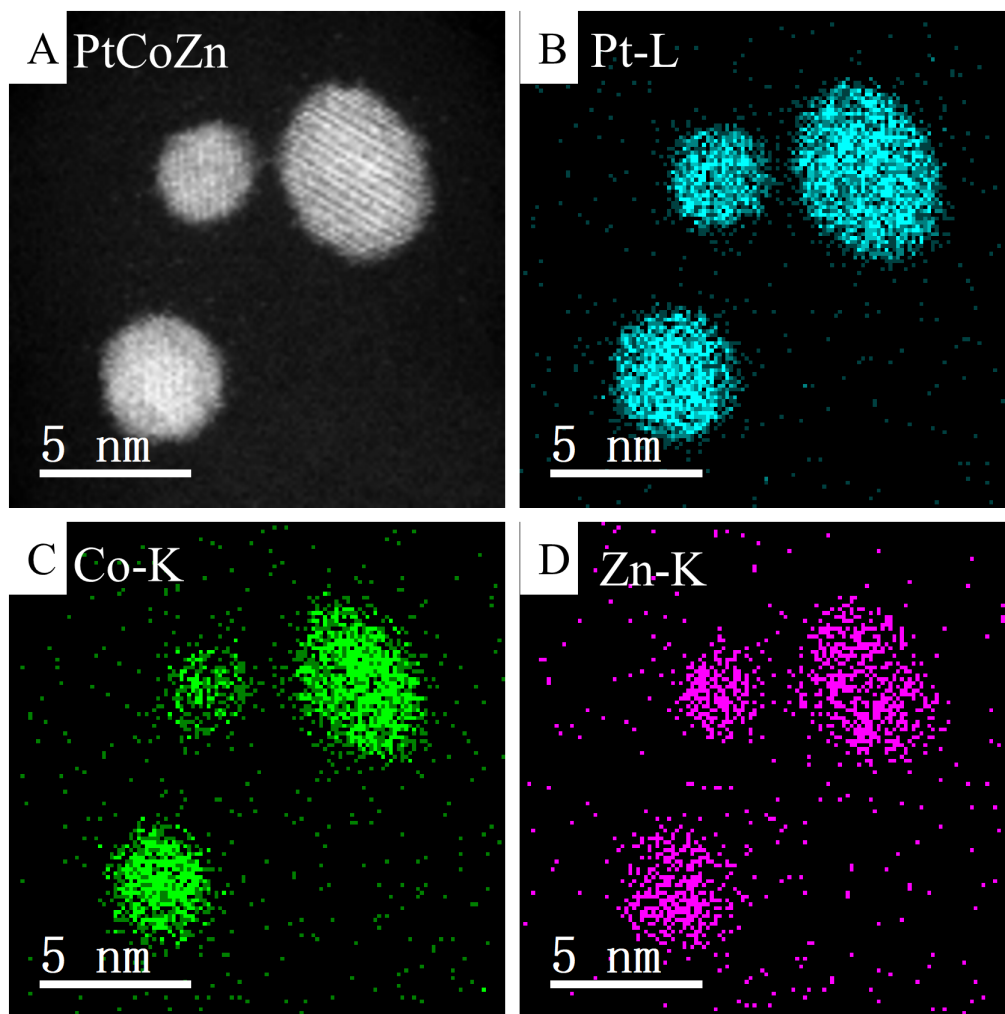

**Figure S8.** (A) STEM image and corresponding (B) Pt-L, (C) Co-K and (D) Zn-K elemental mapping images of  $L1_0\text{-Pt}_5\text{Co}_{2.5}\text{Zn}_{2.5}@\text{Pt}$  NPs.



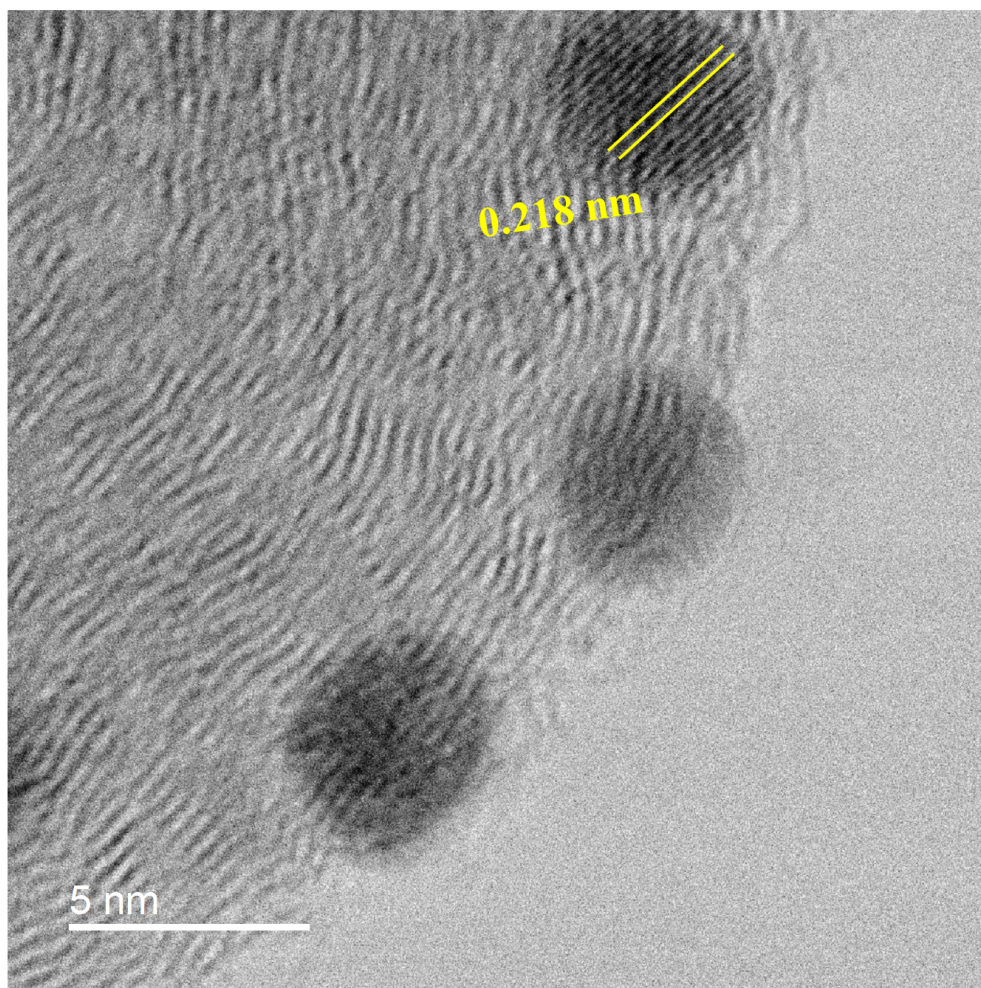

**Figure S9.** HR-TEM image of  $L1_0$ -Pt<sub>5</sub>Ni<sub>2.5</sub>Zn<sub>2.5</sub> NPs supported on carbon after reductive annealing without subsequent acid treatment. The lattice spacing is 0.218 nm which is between those of  $L1_0$ -PtNi ( $d_{(111)} = 0.217$  nm) and  $L1_0$ -PtZn ( $d_{(111)} = 0.222$  nm), indicating the formation of  $L1_0$ -Pt(Ni,Zn) structure.

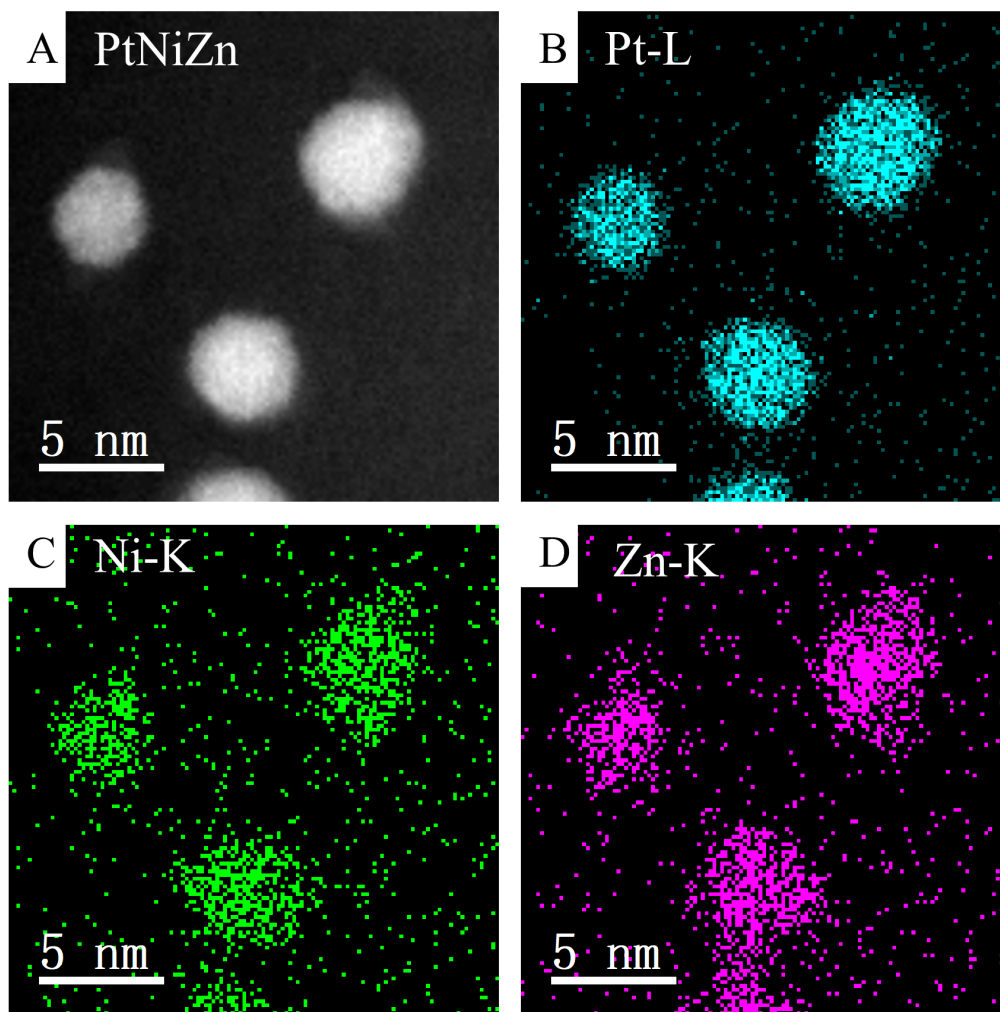

**Figure S10.** (A) STEM image and corresponding (B) Pt-L, (C) Ni-K and (D) Zn-K elemental mapping images of  $L1_0$ -Pt<sub>5</sub>Ni<sub>2.5</sub>Zn<sub>2.5</sub> NPs.

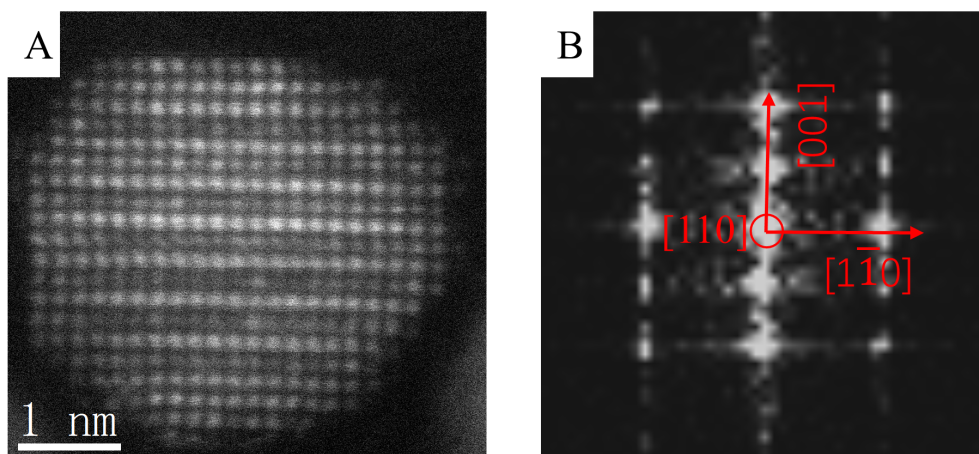

**Figure S11.** (A) HAADF-STEM image and (B) fast Fourier transform (FFT) image of an  $L1_0$ -Pt<sub>5</sub>Ni<sub>2.5</sub>Zn<sub>2.5</sub> NP (zone axis is the  $\langle 110 \rangle$  direction). Alternative columns of bright dots (Pt) and gray dots (Ni, Zn) correspond to  $L1_0$  structure. Superlattice spots corresponding to  $L1_0$  also appear in the FFT image.

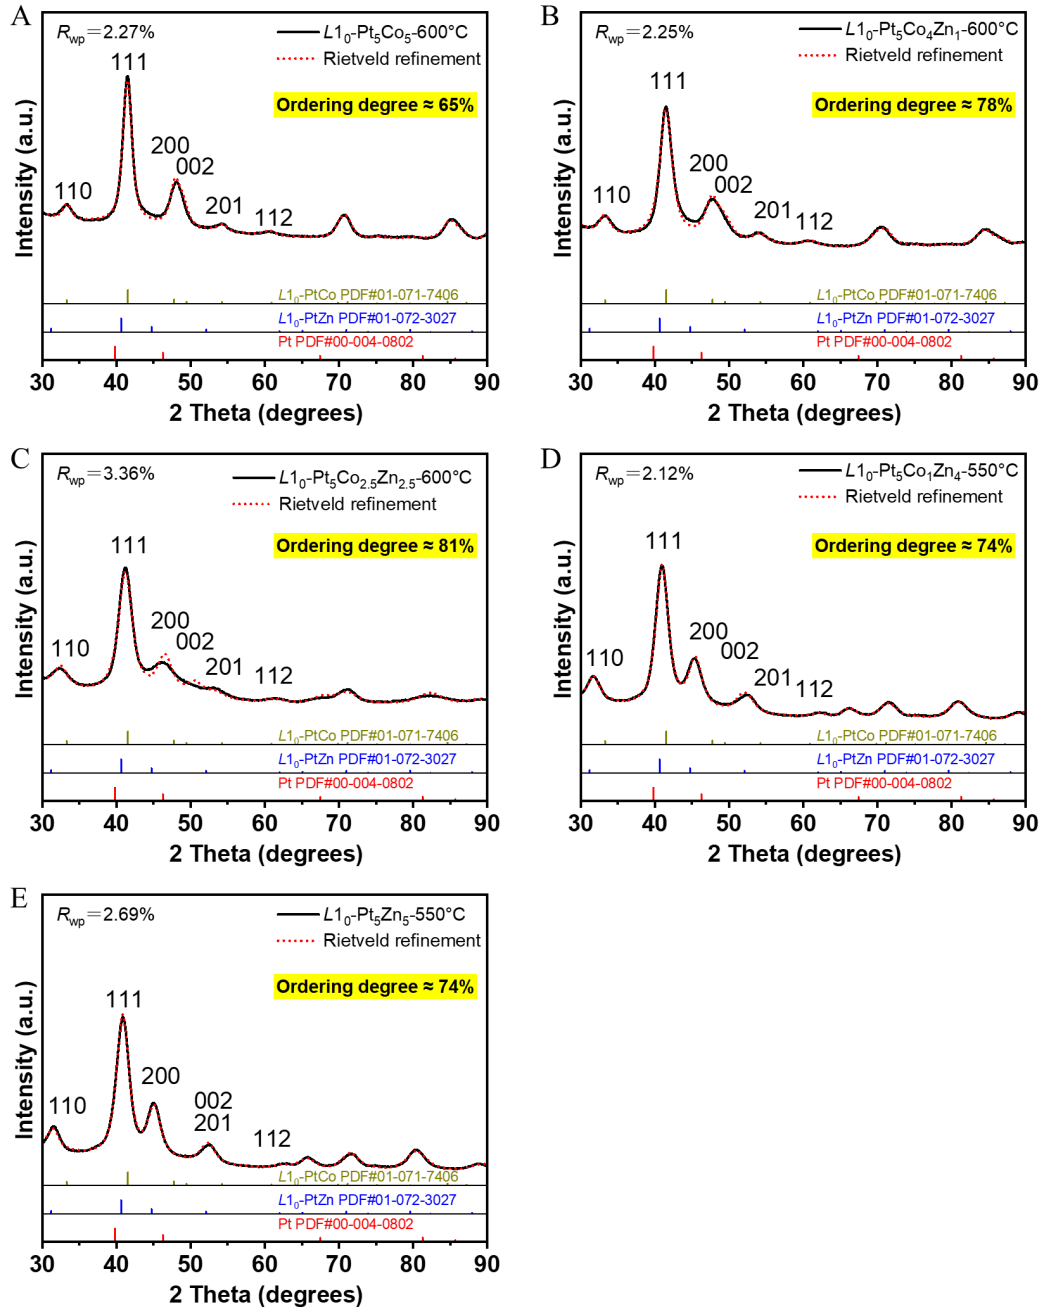

**Figure S12.** Rietveld refinement of XRD patterns of (A)  $L1_0$ -Pt<sub>5</sub>Co<sub>5</sub>, (B)  $L1_0$ -Pt<sub>5</sub>Co<sub>4</sub>Zn<sub>1</sub>, (C)  $L1_0$ -Pt<sub>5</sub>Co<sub>2.5</sub>Zn<sub>2.5</sub>, (D)  $L1_0$ -Pt<sub>5</sub>Co<sub>1</sub>Zn<sub>4</sub> and (E)  $L1_0$ -Pt<sub>5</sub>Zn<sub>5</sub> NPs obtained by reductive annealing for 6 h. The  $L1_0$ -ordering degree was evaluated by calculating the intensity ratio  $I_{110}/I_{111}$ .



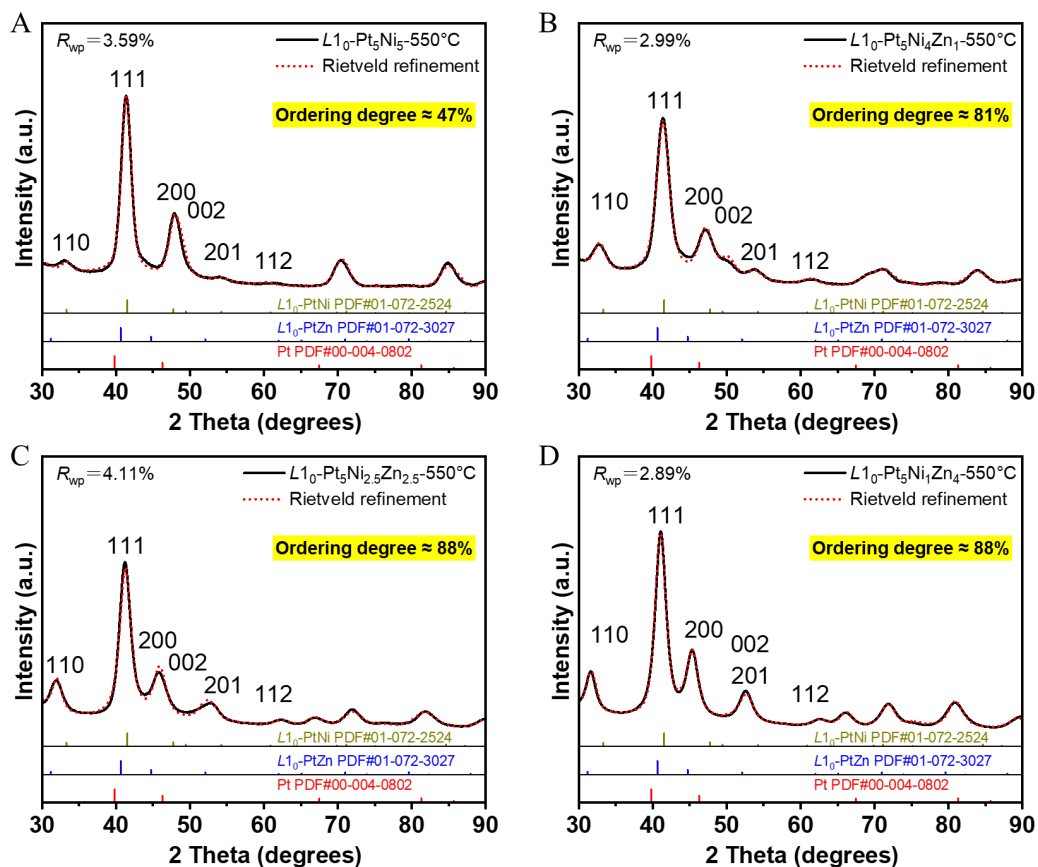

**Figure S13.** Rietveld refinement of XRD patterns of (A)  $L1_0$ -Pt<sub>5</sub>Ni<sub>5</sub>, (B)  $L1_0$ -Pt<sub>5</sub>Ni<sub>4</sub>Zn<sub>1</sub>, (C)  $L1_0$ -Pt<sub>5</sub>Ni<sub>2.5</sub>Zn<sub>2.5</sub> and (D)  $L1_0$ -Pt<sub>5</sub>Ni<sub>1</sub>Zn<sub>4</sub> NPs obtained by reductive annealing at 550 °C for 6 h. The  $L1_0$ -ordering degree was evaluated by calculating the intensity ratio  $I_{110}/I_{111}$ .

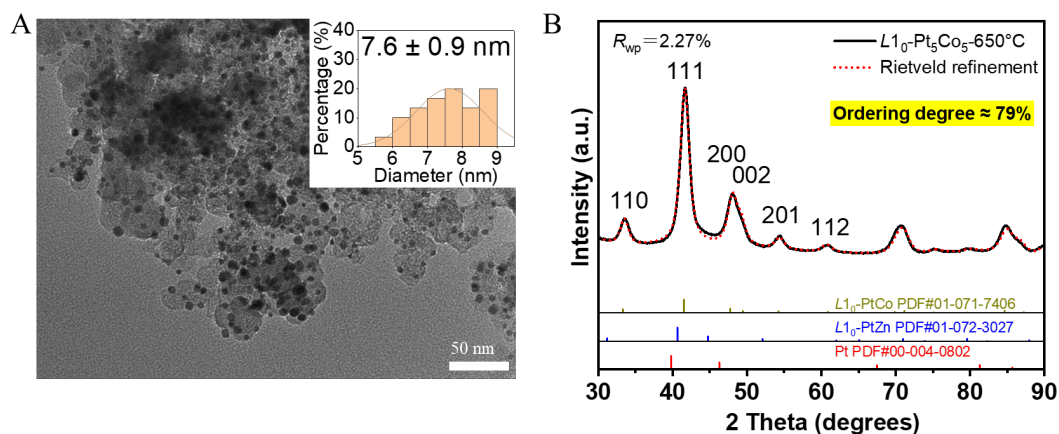

**Figure S14.** (A) TEM image and size distribution (inset) of 7.6-nm  $L1_0$ -Pt<sub>5</sub>Co<sub>5</sub> NPs supported on carbon. (B) Rietveld refinement of the XRD pattern of  $L1_0$ -Pt<sub>5</sub>Co<sub>5</sub> NPs obtained by reductive annealing at 650 °C for 6 h. The  $L1_0$ -ordering degree was evaluated by calculating the intensity ratio  $I_{110}/I_{111}$ .

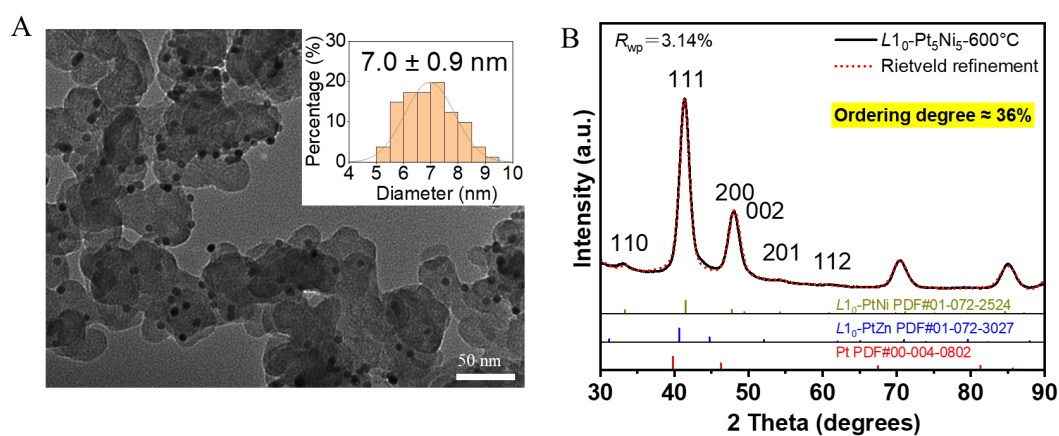

**Figure S15.** (A) TEM image and size distribution (inset) of 6.8-nm  $L1_0$ -Pt<sub>5</sub>Ni<sub>5</sub> NPs supported on carbon. (B) Rietveld refinement of the XRD pattern of  $L1_0$ -Pt<sub>5</sub>Ni<sub>5</sub> NPs obtained by reductive annealing at 600 °C for 6 h. The  $L1_0$ -ordering degree was evaluated by calculating the intensity ratio  $I_{110}/I_{111}$ .

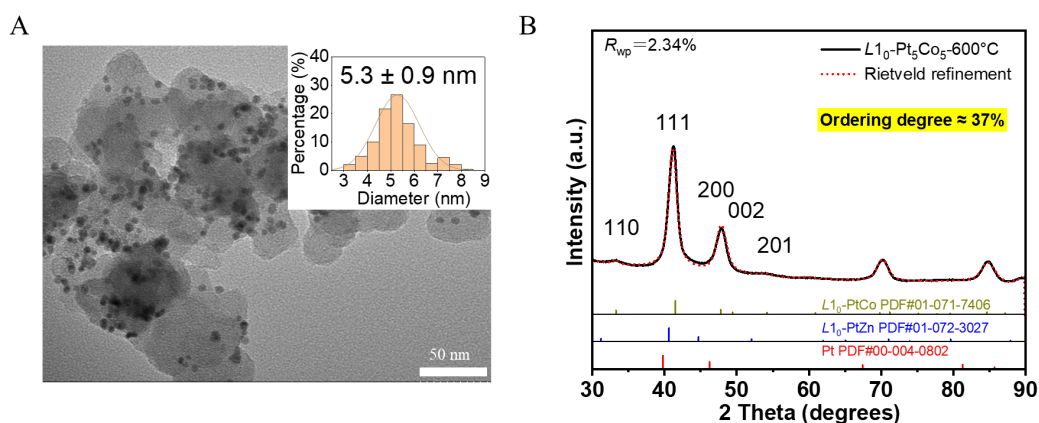

**Figure S16.** (A) TEM image and size distribution (inset) of 5.3-nm  $L_{10}$ -Pt<sub>5</sub>Ni<sub>5</sub> NPs supported on carbon. (B) Rietveld refinement of the XRD pattern of 5.3-nm  $L_{10}$ -Pt<sub>5</sub>Co<sub>5</sub> NPs obtained by reductive annealing at 600 °C for 6 h. The  $L_{10}$ -ordering degree was evaluated by calculating the intensity ratio  $I_{110}/I_{111}$ .

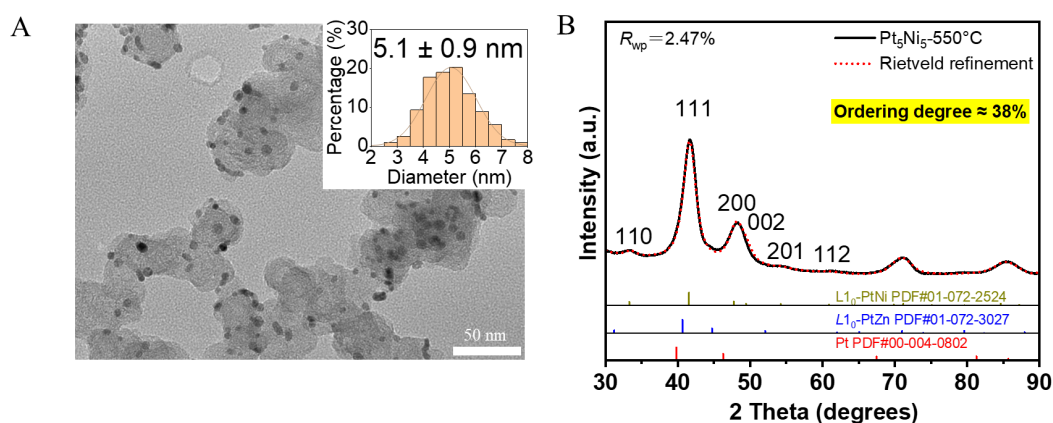

**Figure S17.** (A) TEM image and size distribution (inset) of 5.1-nm  $L_{10}$ -Pt<sub>5</sub>Ni<sub>5</sub> NPs supported on carbon. (B) Rietveld refinement of the XRD pattern of 5.1-nm  $L_{10}$ -Pt<sub>5</sub>Ni<sub>5</sub> NPs obtained by reductive annealing at 550 °C for 6 h. The  $L_{10}$ -ordering degree was evaluated by calculating the intensity ratio  $I_{110}/I_{111}$ .

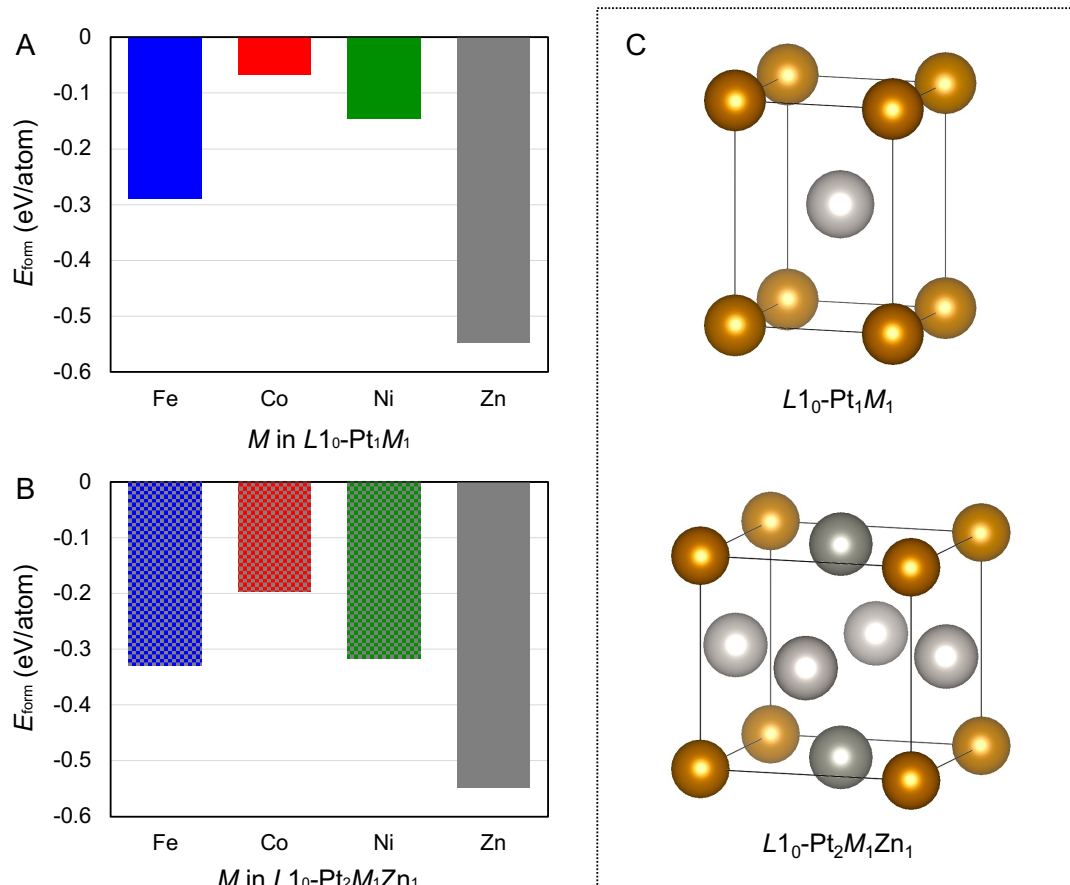

**Figure S18.** Formation energies ( $E_{\text{form}}$ ) of (A)  $L1_0\text{-Pt}_1M_1$  and (B)  $L1_0\text{-Pt}_2M_1\text{Zn}_1$  calculated using the OpenMX code. (C) Atomic models of  $L1_0\text{-Pt}_1M_1$  (upper) and  $L1_0\text{-Pt}_2M_1\text{Zn}_1$  (lower) used for DFT calculations, where the silver, gold, and gray spheres represent Pt,  $M$ , and Zn atoms, respectively. The results of these DFT calculations are in good agreement with those obtained using Matlantis v.7.0.0 (Figure S19), supporting the validity of the large-scale calculations using Matlantis.

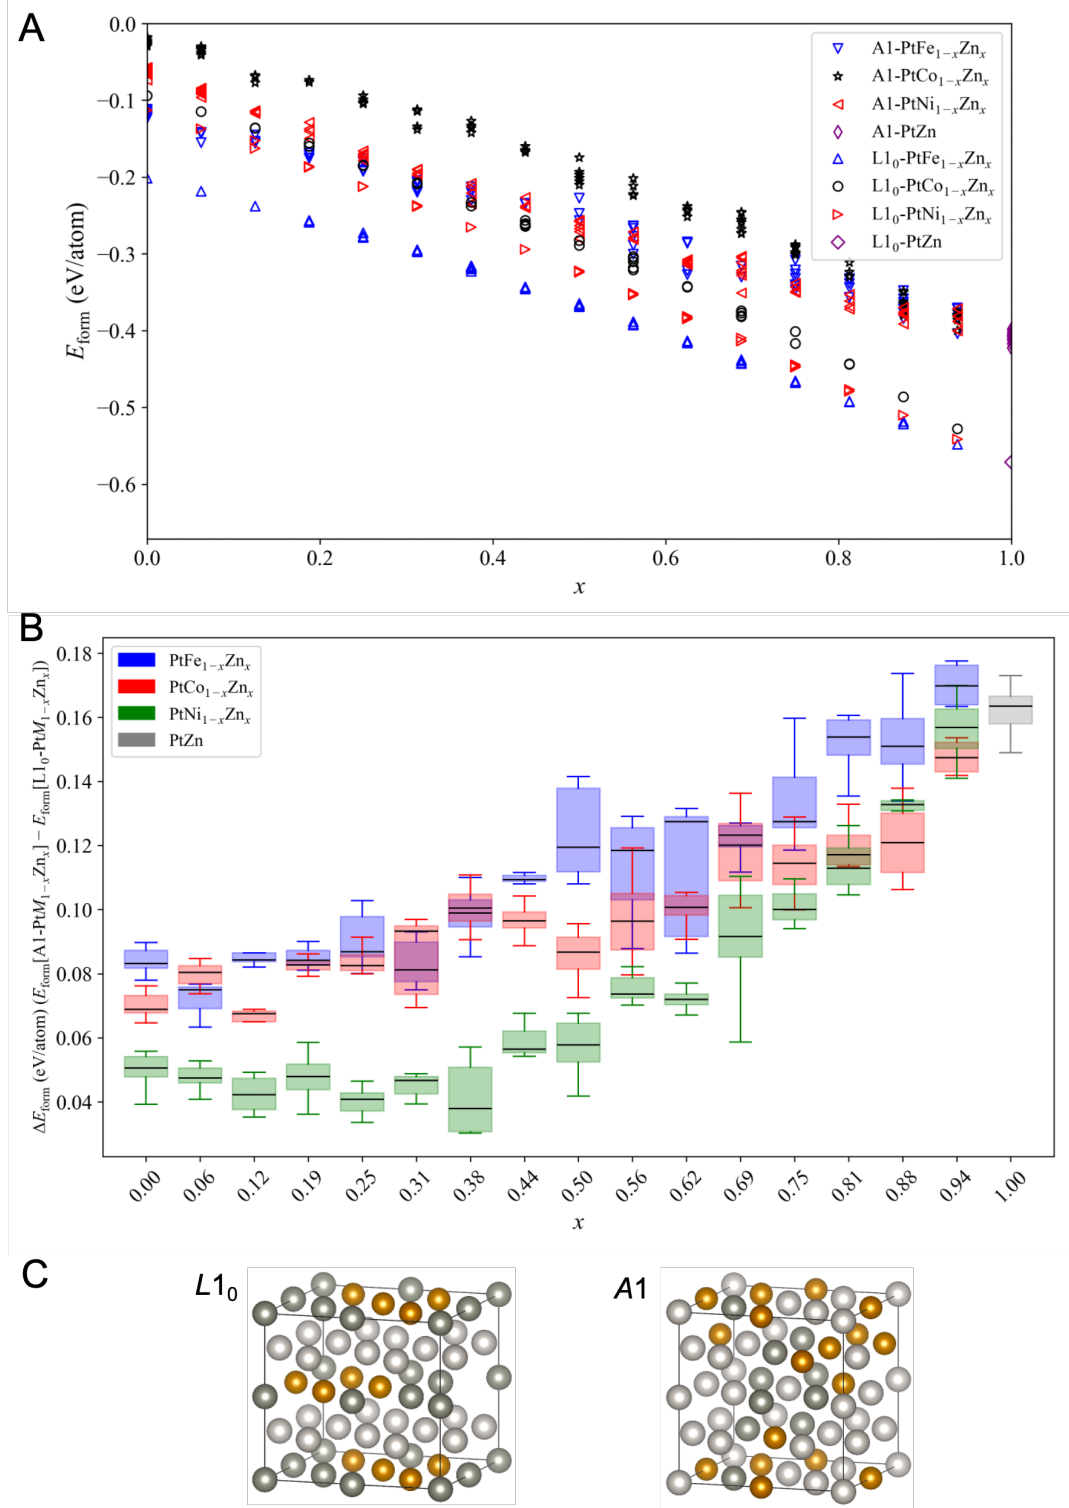

**Figure S19.** (A) Formation energies ( $E_{\text{form}}$ ) of  $A1\text{-Pt}_1M_{1-x}\text{Zn}_x$  and  $L1_0\text{-Pt}_1M_{1-x}\text{Zn}_x$  with varying Zn concentrations (from 0 to 1) calculated using Matlantis v.7.0.0. (B) The difference between  $E_{\text{form}}$  of the  $A1$  and  $L1_0$  structures,  $\Delta E_{\text{form}} = E_{\text{form}}[A1\text{-Pt}M_{1-x}\text{Zn}_x] - E_{\text{form}}[L1_0\text{-Pt}M_{1-x}\text{Zn}_x]$ . (C) Examples of structural models of  $L1_0\text{-Pt}_{16}M_{16-x}\text{Zn}_x$  (left) and  $A1\text{-Pt}_{16}M_{16-x}\text{Zn}_x$  (right) used for calculations based on neural network potential. Silver, gold and gray spheres represent Pt,  $M$  and Zn atoms, respectively.

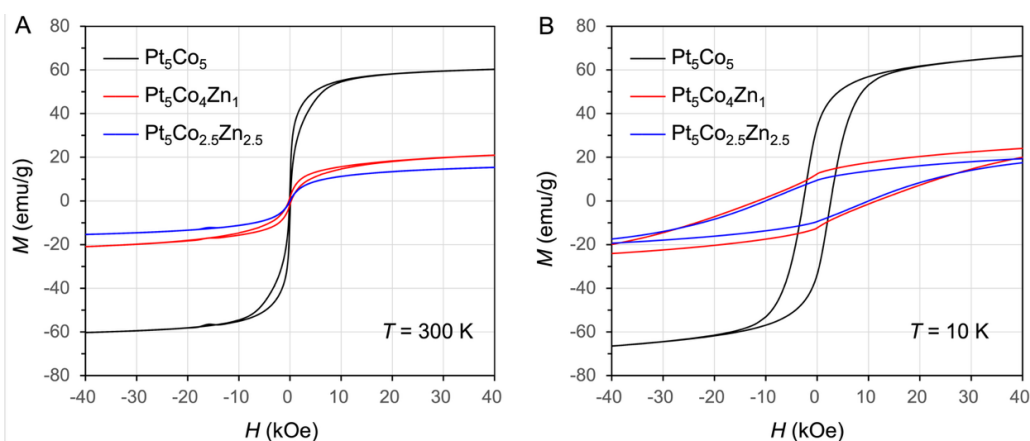

**Figure S20.** Magnetic hysteresis loops of acid-treated  $L1_0$ - $\text{Pt}_5\text{Co}_5/\text{C}$ ,  $L1_0$ - $\text{Pt}_5\text{Co}_4\text{Zn}_1/\text{C}$  and  $L1_0$ - $\text{Pt}_5\text{Co}_{2.5}\text{Zn}_{2.5}/\text{C}$  obtained by reductive annealing at 600 °C for 6 h measured at (A) 300 K and (B) 10 K.

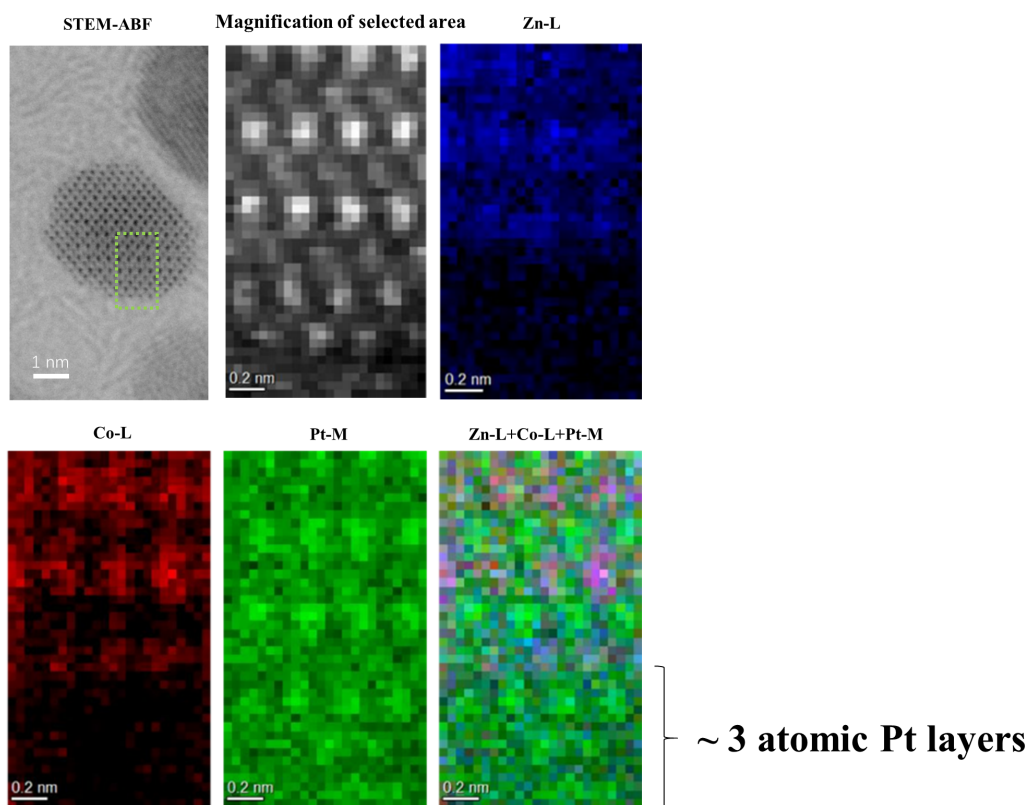

**Figure S21.** STEM image (top left) and corresponding EELS mapping images showing the approximately three atomic layers of Pt shell at the NP surface of an  $L1_0$ - $\text{Pt}_5\text{Co}_{2.5}\text{Zn}_{2.5}@\text{Pt}$  NP.

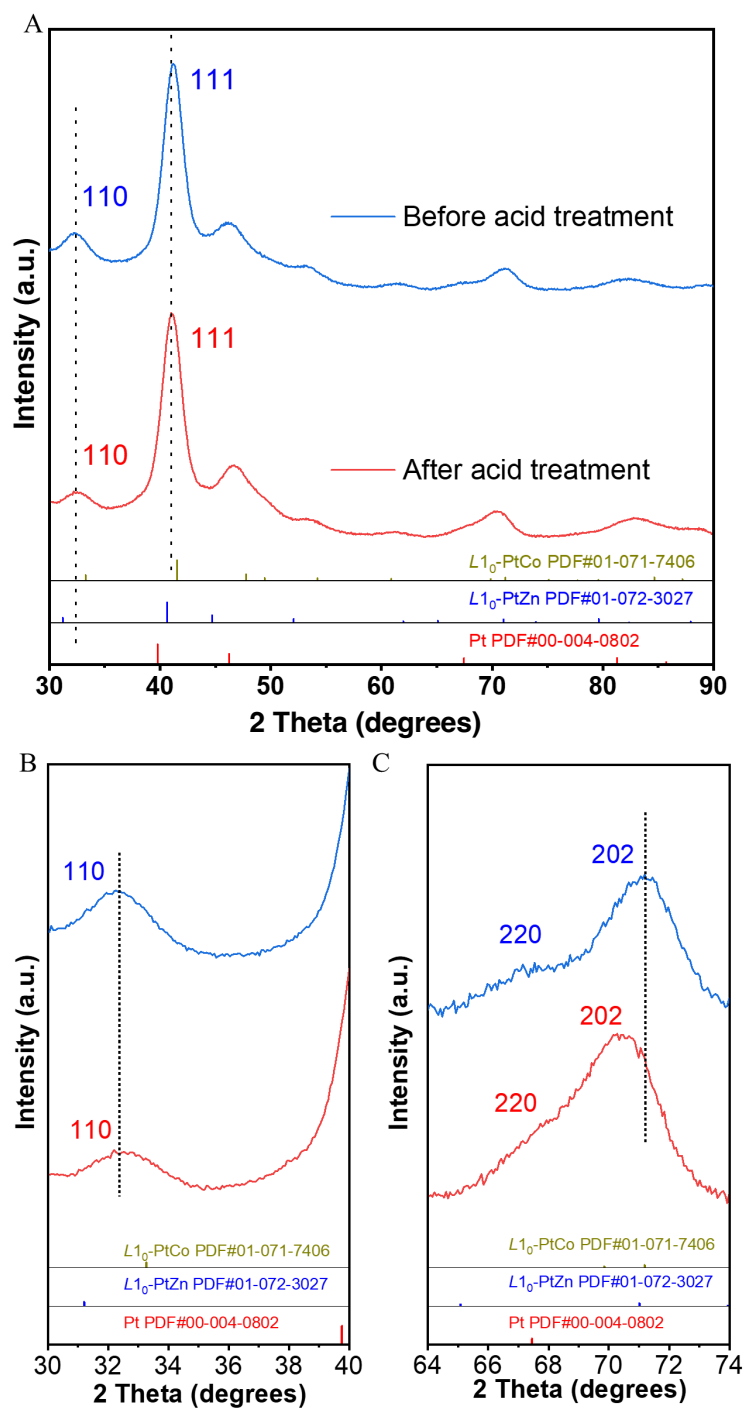

**Figure S22.** (A) XRD patterns of  $L1_0\text{-Pt}_5\text{Co}_{2.5}\text{Zn}_{2.5}/\text{C}$  obtained by reductive annealing at 600 °C for 6 h before and after acid treatment. Magnified views in the ranges between (B) 30° and 40° and (C) 64° and 74°.



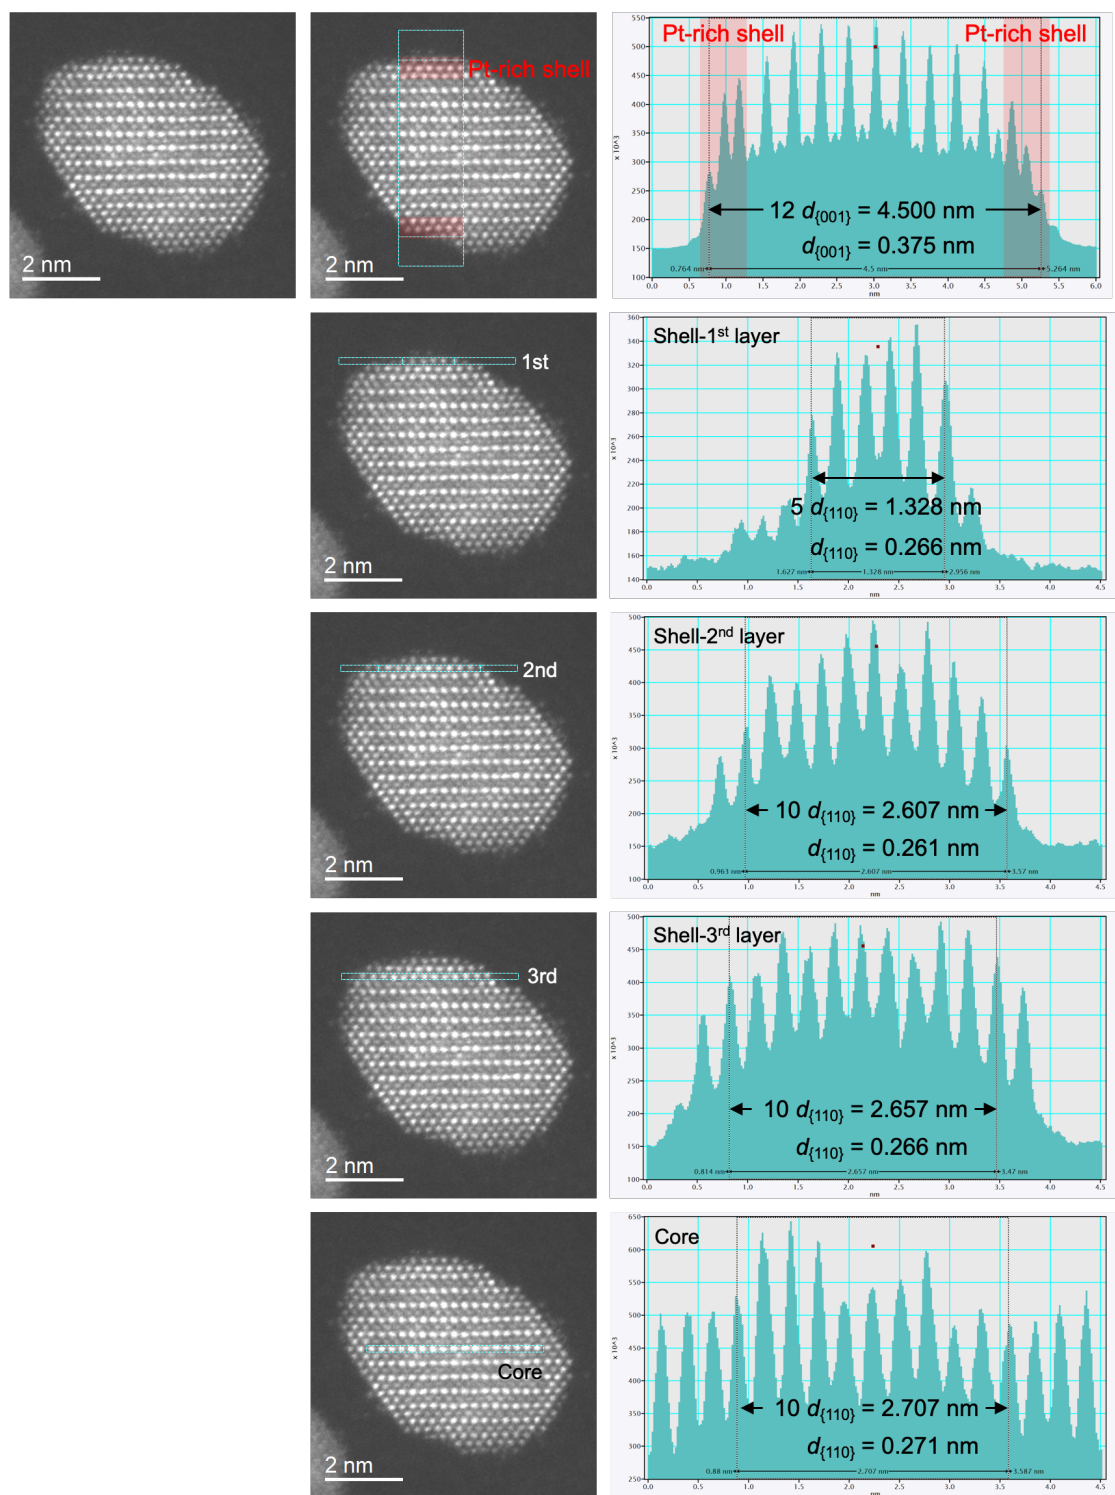

**Figure S23.** Actual interatomic distances in the  $\{001\}$  planes projected from the  $\langle 110 \rangle$  direction and the  $\{110\}$  planes projected from the  $\langle 001 \rangle$  direction in a single  $L1_0$ - $\text{Pt}_5\text{Co}_{2.5}\text{Zn}_{2.5}@\text{Pt}$  NP.



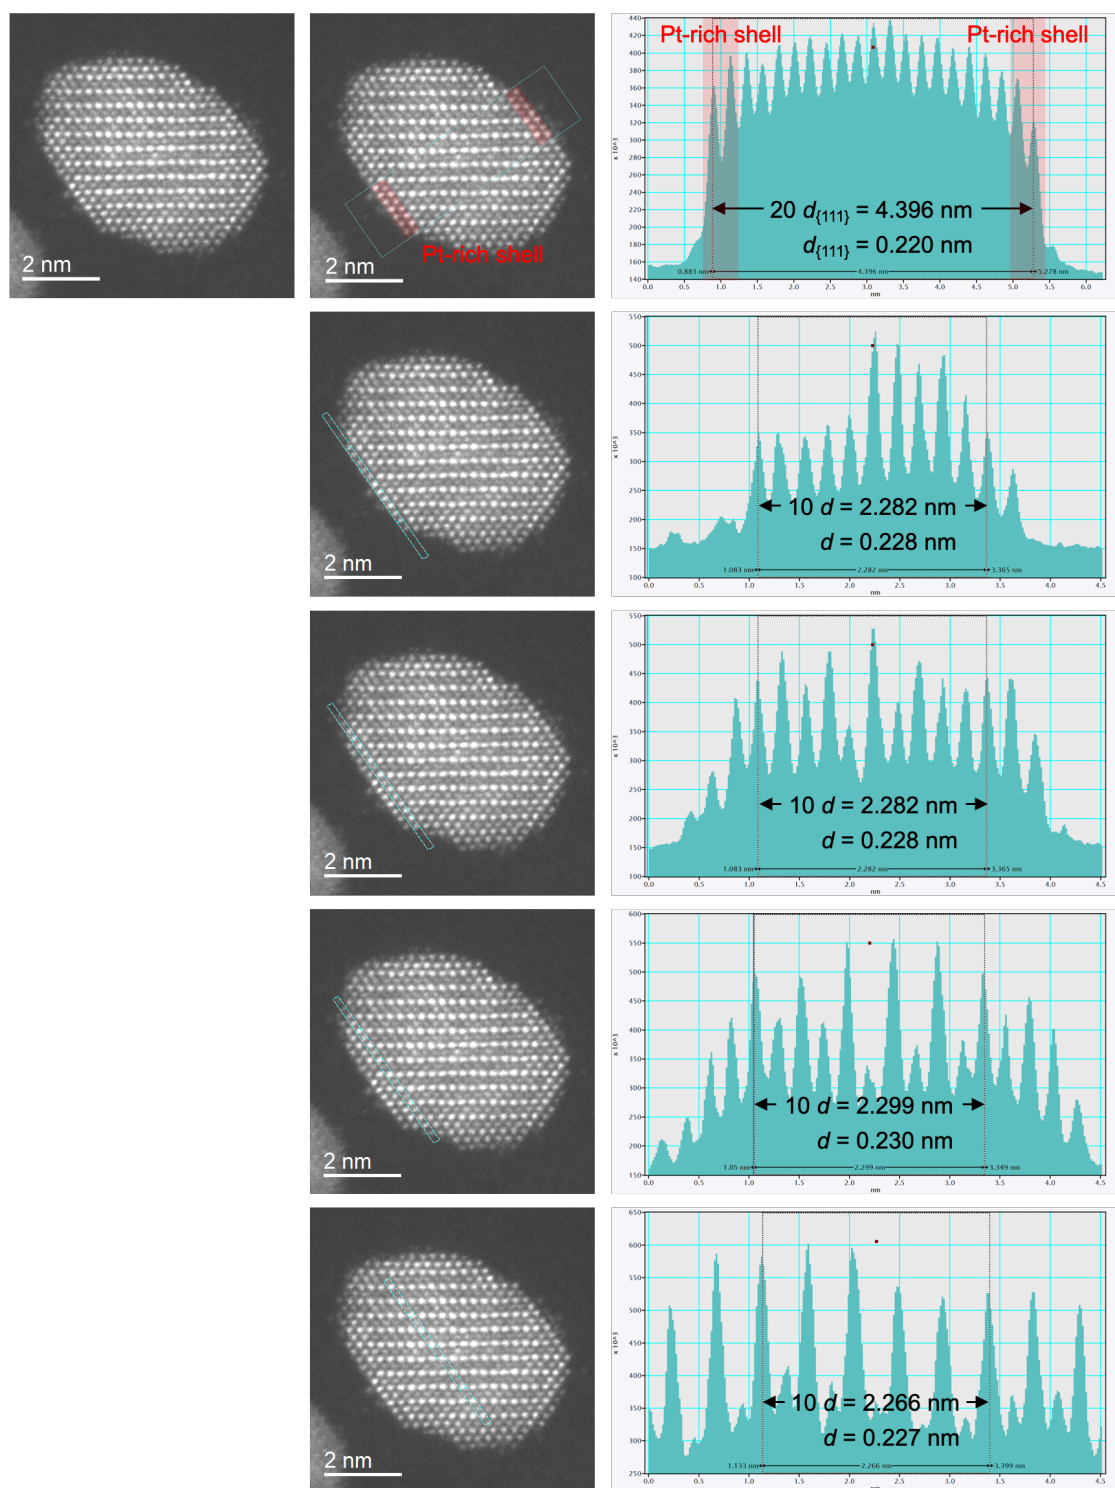

**Figure S24.** Actual interatomic distances in the {111} planes in a single  $L1_0$ - $\text{Pt}_5\text{Co}_{2.5}\text{Zn}_{2.5}@\text{Pt}$  NP.

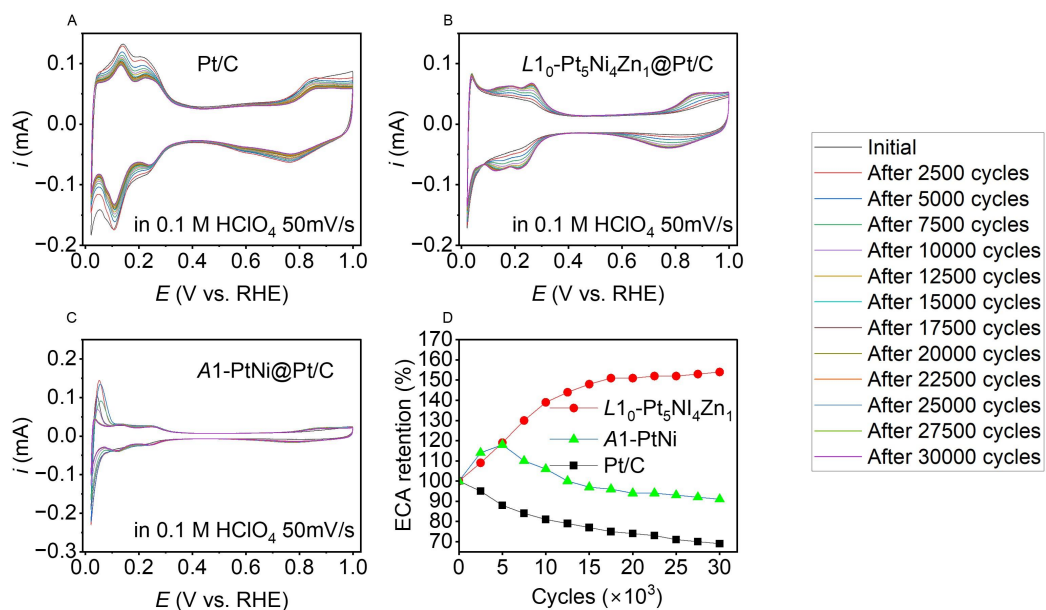

**Figure S25.** CV measurement for the catalysts (A) commercial Pt/C, (B)  $L1_0\text{-Pt}_5\text{Ni}_4\text{Zn}_1\text{@Pt/C}$  and (C)  $A1\text{-Pt}_5\text{Ni}_5\text{@Pt/C}$  under different ADT cycles. (D) ECSA changing ratio of the prepared catalysts during the ADT cycles in the RDE test.

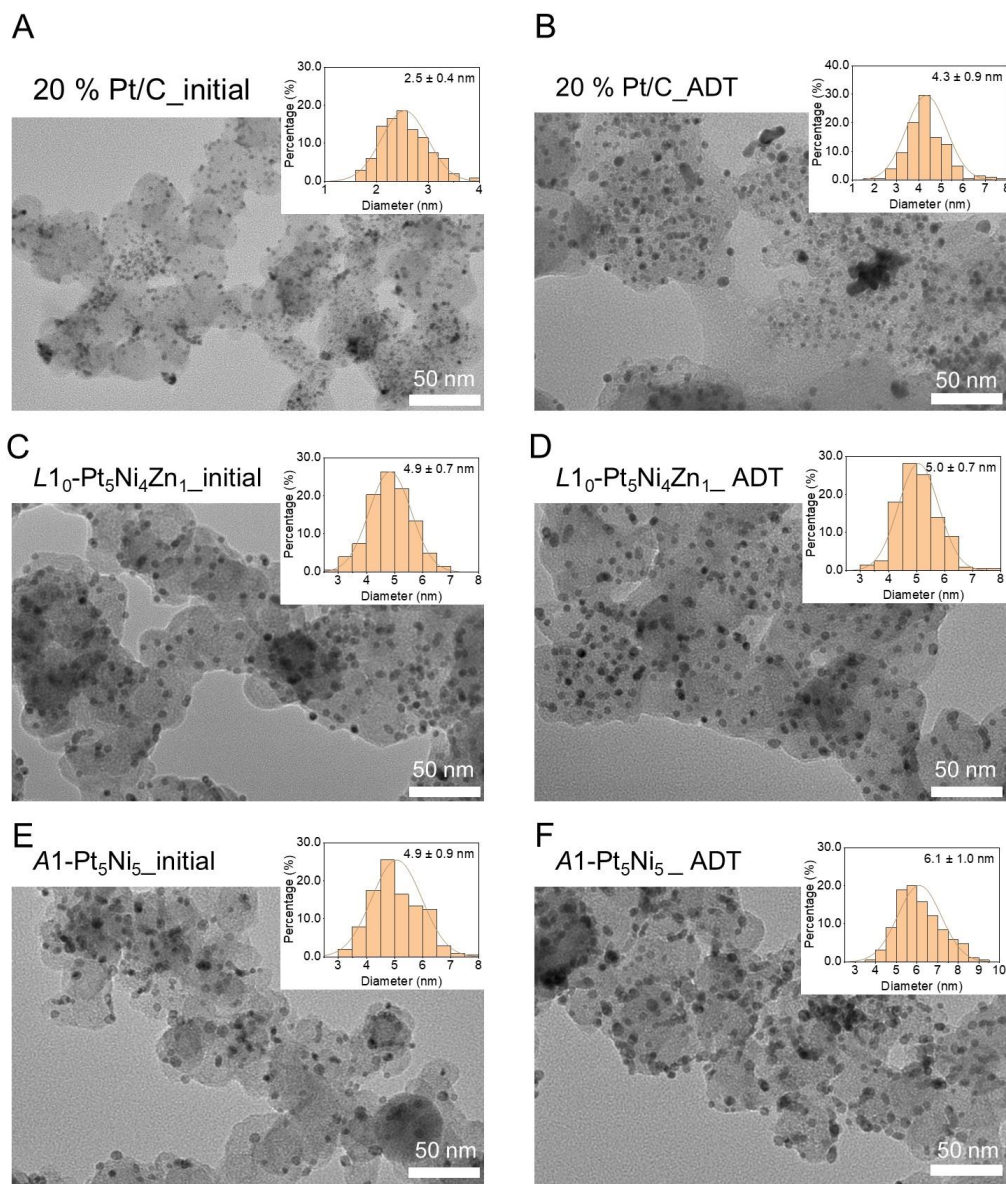

**Figure S26.** TEM images of (A, B) commercial Pt/C, (C, D)  $L1_0$ -Pt<sub>5</sub>Ni<sub>4</sub>Zn<sub>1</sub>@Pt/C and (E, F) A1-Pt<sub>5</sub>Ni<sub>5</sub>@Pt/C before (A, C, E) and after (B, D, F) ADT cycles.

Supplementary Tables:

**Table S1.** Literature values of lattice constants of tetragonal ( $a = b \neq c$ ,  $\alpha = \beta = \gamma = 90^\circ$ )  $L1_0$ -PtM and cubic ( $a = b = c$ ,  $\alpha = \beta = \gamma = 90^\circ$ ) face-centered cubic (fcc)-Pt.

|                   | Lattice constant |         |                              |                         | Reference   |
|-------------------|------------------|---------|------------------------------|-------------------------|-------------|
|                   | $a = b$ (Å)      | $c$ (Å) | Volume $V$ (Å <sup>3</sup> ) | Tetragonality $a/c$ (–) | PDF #       |
| $L1_0$ -PtFe      | 3.852            | 3.713   | 55.09                        | 1.037                   | 00-043-1359 |
| $L1_0$ -PtCo      | 3.806            | 3.684   | 53.37                        | 1.033                   | 01-071-7406 |
| $L1_0$ -PtNi      | 3.821            | 3.591   | 52.43                        | 1.064                   | 01-072-2524 |
| $L1_0$ -PtZn      | 4.050            | 3.510   | 57.57                        | 1.154                   | 01-072-3027 |
| <i>cf.</i> fcc-Pt | 3.923            | 3.923   | 60.37                        | 1                       | 00-004-0802 |

**Table S2.** Relative integrated intensities of simulated XRD peaks for fully ordered  $L1_0$ -Pt(M,Zn) IMCs with various compositions.

| Composition                                                 | $I_{110}^*$ | $I_{111}^*$ | $I_{110}^*/I_{111}^*$ |
|-------------------------------------------------------------|-------------|-------------|-----------------------|
| $L1_0$ -Pt <sub>5</sub> Co <sub>5</sub>                     | 24.06       | 100         | 0.2406                |
| $L1_0$ -Pt <sub>5</sub> Co <sub>4</sub> Zn <sub>1</sub>     | 23.30       | 100         | 0.2330                |
| $L1_0$ -Pt <sub>5</sub> Co <sub>2.5</sub> Zn <sub>2.5</sub> | 22.45       | 100         | 0.2245                |
| $L1_0$ -Pt <sub>5</sub> Co <sub>1</sub> Zn <sub>4</sub>     | 22.14       | 100         | 0.2214                |
| $L1_0$ -Pt <sub>5</sub> Ni <sub>5</sub>                     | 22.50       | 100         | 0.2250                |
| $L1_0$ -Pt <sub>5</sub> Ni <sub>4</sub> Zn <sub>1</sub>     | 22.50       | 100         | 0.2250                |
| $L1_0$ -Pt <sub>5</sub> Ni <sub>2.5</sub> Zn <sub>2.5</sub> | 22.77       | 100         | 0.2277                |
| $L1_0$ -Pt <sub>5</sub> Ni <sub>1</sub> Zn <sub>4</sub>     | 22.20       | 100         | 0.2220                |
| $L1_0$ -Pt <sub>5</sub> Zn <sub>5</sub>                     | 20.99       | 100         | 0.2099                |

**Table S3.** Average diameters ( $d_{\text{TEM}}$ ) and crystallite sizes ( $d_{\text{XRD}}$ ) of Pt–*M*–Zn NPs before and after reductive annealing obtained from TEM analysis and by applying the Scherrer equation to XRD data, respectively.

| Sample                                                    | Before annealing      | After annealing       |                       |
|-----------------------------------------------------------|-----------------------|-----------------------|-----------------------|
|                                                           | $d_{\text{TEM}}$ (nm) | $d_{\text{TEM}}$ (nm) | $d_{\text{XRD}}$ (nm) |
| Pt <sub>51</sub> Co <sub>49</sub> -650°C                  | 6.5                   | 7.6                   | 6.2                   |
| Pt <sub>47</sub> Co <sub>43</sub> Zn <sub>10</sub> -600°C | 5.4                   | 5.1                   | 4.5                   |
| Pt <sub>56</sub> Co <sub>23</sub> Zn <sub>21</sub> -600°C | 4.8                   | 4.6                   | 4.2                   |
| Pt <sub>53</sub> Co <sub>11</sub> Zn <sub>38</sub> -550°C | 4.2                   | 4.4                   | 4.0                   |
| Pt <sub>52</sub> Ni <sub>48</sub> -10BBA-550°C            | 6.7                   | 7.1                   | 5.8                   |
| Pt <sub>52</sub> Ni <sub>37</sub> Zn <sub>11</sub> -550°C | 5.2                   | 5.7                   | 4.9                   |
| Pt <sub>49</sub> Ni <sub>22</sub> Zn <sub>29</sub> -550°C | 4.2                   | 4.9                   | 4.6                   |
| Pt <sub>49</sub> Ni <sub>9</sub> Zn <sub>42</sub> -550°C  | 3.5                   | 4.8                   | 4.2                   |
| Pt <sub>53</sub> Zn <sub>47</sub> -550°C                  | 2.6                   | 3.7                   | 3.1                   |

**Table S4.** Compositions and Pt loadings of  $L1_0$ -Pt(*M*,Zn)/C before and after acid treatment obtained by SEM-EDS and TGA, respectively.

| Sample                                                             | Composition                                        |                                                    | Pt loading (%) |
|--------------------------------------------------------------------|----------------------------------------------------|----------------------------------------------------|----------------|
|                                                                    | Before acid treatment                              | After acid treatment                               |                |
| $L1_0$ -Pt <sub>5</sub> Co <sub>5</sub> -650°C                     | Pt <sub>51</sub> Co <sub>49</sub>                  | Pt <sub>56</sub> Co <sub>44</sub>                  | 13.8           |
| $L1_0$ -Pt <sub>5</sub> Co <sub>4</sub> Zn <sub>1</sub> -600°C     | Pt <sub>47</sub> Co <sub>43</sub> Zn <sub>10</sub> | Pt <sub>61</sub> Co <sub>34</sub> Zn <sub>5</sub>  | 12.5           |
| $L1_0$ -Pt <sub>5</sub> Co <sub>2.5</sub> Zn <sub>2.5</sub> -600°C | Pt <sub>56</sub> Co <sub>23</sub> Zn <sub>20</sub> | Pt <sub>66</sub> Co <sub>18</sub> Zn <sub>16</sub> | 11.2           |
| $L1_0$ -Pt <sub>5</sub> Co <sub>1</sub> Zn <sub>4</sub> -550°C     | Pt <sub>53</sub> Co <sub>11</sub> Zn <sub>38</sub> | Pt <sub>68</sub> Co <sub>7</sub> Zn <sub>25</sub>  | 12.3           |
| $L1_0$ -Pt <sub>5</sub> Ni <sub>5</sub> -550°C                     | Pt <sub>52</sub> Ni <sub>48</sub>                  | Pt <sub>57</sub> Ni <sub>43</sub>                  | 11.6           |
| $L1_0$ -Pt <sub>5</sub> Ni <sub>4</sub> Zn <sub>1</sub> -550°C     | Pt <sub>52</sub> Ni <sub>37</sub> Zn <sub>11</sub> | Pt <sub>57</sub> Ni <sub>34</sub> Zn <sub>9</sub>  | 12.3           |
| $L1_0$ -Pt <sub>5</sub> Ni <sub>2.5</sub> Zn <sub>2.5</sub> -550°C | Pt <sub>48</sub> Ni <sub>22</sub> Zn <sub>30</sub> | Pt <sub>65</sub> Ni <sub>14</sub> Zn <sub>21</sub> | 12.9           |
| $L1_0$ -Pt <sub>5</sub> Ni <sub>1</sub> Zn <sub>4</sub> -550°C     | Pt <sub>49</sub> Ni <sub>9</sub> Zn <sub>42</sub>  | Pt <sub>62</sub> Ni <sub>8</sub> Zn <sub>30</sub>  | 14.3           |
| $L1_0$ -Pt <sub>5</sub> Zn <sub>5</sub> -550°C                     | Pt <sub>53</sub> Zn <sub>47</sub>                  | Pt <sub>69</sub> Zn <sub>31</sub>                  | 10.9           |

**Table S5.** Lattice constants and LRO parameters ( $S$ ) of  $L1_0$ -Pt( $M$ ,Zn) NPs after reductive annealing determined from Rietveld-refined XRD patterns.

| Sample                                                                 | $d_{\text{TEM}}$<br>(nm) | Lattice constant |            |              | $I_{110}/I_{111}$ | LRO<br>parameter<br>$S$ (%) |
|------------------------------------------------------------------------|--------------------------|------------------|------------|--------------|-------------------|-----------------------------|
|                                                                        |                          | $a = b$<br>(Å)   | $c$<br>(Å) | $a/c$<br>(–) |                   |                             |
| $L1_0$ -Pt <sub>5</sub> Co <sub>5</sub> -<br>650°C                     | 7.6                      | 3.793            | 3.719      | 1.020        | 0.1530            | 79                          |
| $L1_0$ -Pt <sub>5</sub> Co <sub>5</sub> -<br>600°C                     | 6.8                      | 3.797            | 3.711      | 1.023        | 0.1078            | 65 (low)                    |
| $L1_0$ -Pt <sub>5</sub> Co <sub>5</sub> -<br>600°C                     | 5.3                      | 3.806            | 3.727      | 1.021        | 0.0322            | 37                          |
| $L1_0$ -Pt <sub>5</sub> Co <sub>4</sub> Zn <sub>1</sub> -<br>600°C     | 5.1                      | 3.815            | 3.688      | 1.034        | 0.1409            | 78                          |
| $L1_0$ -Pt <sub>5</sub> Co <sub>2.5</sub> Zn <sub>2.5</sub> -<br>600°C | 4.6                      | 3.893            | 3.678      | 1.058        | 0.1473            | 81                          |
| $L1_0$ -Pt <sub>5</sub> Co <sub>1</sub> Zn <sub>4</sub> -<br>550°C     | 4.4                      | 3.992            | 3.528      | 1.132        | 0.1226            | 74                          |
| $L1_0$ -Pt <sub>5</sub> Ni <sub>5</sub> -<br>600°C                     | 7.0                      | 3.795            | 3.749      | 1.012        | 0.0255            | 36                          |
| $L1_0$ -Pt <sub>5</sub> Ni <sub>5</sub> -<br>550°C                     | 7.1                      | 3.800            | 3.702      | 1.026        | 0.0494            | 47                          |
| $L1_0$ -Pt <sub>5</sub> Ni <sub>5</sub> -<br>550°C                     | 5.1                      | 3.785            | 3.695      | 1.024        | 0.0406            | 38                          |
| $L1_0$ -Pt <sub>5</sub> Ni <sub>4</sub> Zn <sub>1</sub> -<br>550°C     | 5.7                      | 3.844            | 3.658      | 1.051        | 0.1479            | 81                          |
| $L1_0$ -Pt <sub>5</sub> Ni <sub>2.5</sub> Zn <sub>2.5</sub> -<br>550°C | 4.9                      | 3.961            | 3.521      | 1.125        | 0.1771            | 88                          |
| $L1_0$ -Pt <sub>5</sub> Ni <sub>1</sub> Zn <sub>4</sub> -<br>550°C     | 4.8                      | 3.994            | 3.484      | 1.146        | 0.1720            | 88                          |
| $L1_0$ -Pt <sub>5</sub> Zn <sub>5</sub> -<br>550°C                     | 3.7                      | 4.022            | 3.474      | 1.158        | 0.1156            | 74                          |

**Table S6.** ECSA values and catalytic activities of  $L1_0$ -Pt( $M$ ,Zn)@Pt/C

| Sample                                                             | $d_{\text{TEM}}$ (nm) | ECSA<br>( $\text{m}^2_{\text{Pt}}/\text{g}_{\text{Pt}}$ ) | Mass<br>activity<br>( $\text{A}/\text{mg}_{\text{Pt}}$ ) | Specific<br>activity<br>( $\text{mA}/\text{cm}^2_{\text{Pt}}$ ) |
|--------------------------------------------------------------------|-----------------------|-----------------------------------------------------------|----------------------------------------------------------|-----------------------------------------------------------------|
| $L1_0$ -Pt <sub>5</sub> Co <sub>5</sub> -650°C                     | 7.6                   | 44                                                        | 0.752                                                    | 1.722                                                           |
| $L1_0$ -Pt <sub>5</sub> Co <sub>4</sub> Zn <sub>1</sub> -600°C     | 5.1                   | 40                                                        | 0.686                                                    | 1.711                                                           |
| $L1_0$ -Pt <sub>5</sub> Co <sub>2.5</sub> Zn <sub>2.5</sub> -600°C | 4.6                   | 52                                                        | 0.462                                                    | 0.881                                                           |
| $L1_0$ -Pt <sub>5</sub> Co <sub>1</sub> Zn <sub>4</sub> -550°C     | 4.4                   | 60                                                        | 0.524                                                    | 0.876                                                           |
| $L1_0$ -Pt <sub>5</sub> Ni <sub>5</sub> -550°C                     | 7.1                   | 25                                                        | 0.122                                                    | 0.491                                                           |
| $L1_0$ -Pt <sub>5</sub> Ni <sub>4</sub> Zn <sub>1</sub> -550°C     | 5.2                   | 45                                                        | 0.629                                                    | 1.403                                                           |
| $L1_0$ -Pt <sub>5</sub> Ni <sub>2.5</sub> Zn <sub>2.5</sub> -550°C | 4.9                   | 51                                                        | 0.643                                                    | 1.261                                                           |
| $L1_0$ -Pt <sub>5</sub> Ni <sub>1</sub> Zn <sub>4</sub> -550°C     | 4.8                   | 42                                                        | 0.418                                                    | 0.992                                                           |
| $L1_0$ -Pt <sub>5</sub> Zn <sub>5</sub> -550°C                     | 3.7                   | 60                                                        | 0.532                                                    | 0.891                                                           |
| <i>cf.</i> Pt/C                                                    | 2–3                   | 67                                                        | 0.205                                                    | 0.303                                                           |

**Table S7.** Surface strain and ORR specific activities of  $L1_0$ -Pt(*M*,Zn)@Pt/C

| Sample                                                         | Lattice constant          |                       | {111}<br>triangle<br>area<br>(Å <sup>3</sup> ) | {111}<br>surface<br>strain<br>(%) | ORR<br>specific<br>activity<br>(mA cm <sup>-2</sup> ) |
|----------------------------------------------------------------|---------------------------|-----------------------|------------------------------------------------|-----------------------------------|-------------------------------------------------------|
|                                                                | $a = b$ (Å <sup>3</sup> ) | $c$ (Å <sup>3</sup> ) |                                                |                                   |                                                       |
| Pt <sub>5</sub> Co <sub>5</sub> -650°C                         | 3.793                     | 3.719                 | 3.074                                          | -7.84                             | 1.722                                                 |
| Pt <sub>5</sub> Co <sub>5</sub> -600°C                         | 3.797                     | 3.711                 | 3.074                                          | -7.83                             | n.d.                                                  |
| Pt <sub>5</sub> Co <sub>4</sub> Zn <sub>1</sub> -<br>600°C     | 3.815                     | 3.688                 | 3.081                                          | -7.62                             | 1.711                                                 |
| Pt <sub>5</sub> Co <sub>2.5</sub> Zn <sub>2.5</sub> -<br>550°C | 3.893                     | 3.678                 | 3.162                                          | -5.20                             | 0.881                                                 |
| Pt <sub>5</sub> Co <sub>1</sub> Zn <sub>4</sub> -<br>550°C     | 3.992                     | 3.528                 | 3.189                                          | -4.41                             | 0.876                                                 |
| Pt <sub>5</sub> Ni <sub>5</sub> -550°C                         | 3.800                     | 3.702                 | 3.073                                          | -7.87                             | 0.491                                                 |
| Pt <sub>5</sub> Ni <sub>4</sub> Zn <sub>1</sub> -<br>550°C     | 3.844                     | 3.658                 | 3.098                                          | -7.26                             | 1.403                                                 |
| Pt <sub>5</sub> Ni <sub>2.5</sub> Zn <sub>2.5</sub> -<br>550°C | 3.961                     | 3.521                 | 3.149                                          | -5.58                             | 1.261                                                 |
| Pt <sub>5</sub> Ni <sub>1</sub> Zn <sub>4</sub> -<br>550°C     | 3.994                     | 3.484                 | 3.167                                          | -5.05                             | 0.992                                                 |
| Pt <sub>5</sub> Zn <sub>5</sub> -550°C                         | 4.022                     | 3.474                 | 3.192                                          | -4.30                             | 0.891                                                 |
| Pt (ref)                                                       | 3.925                     | 3.925                 | 3.335                                          | 0                                 | 0.303                                                 |
